# Supplementary material for: PIWIL2 interacting with IKK to regulate autophagy and apoptosis in esophageal squamous cell carcinoma
Source: PubMed Central journal article supplement (PMC8184941; doi:10.1038/s41418-020-00725-4), 2021-01-19

Figure S2

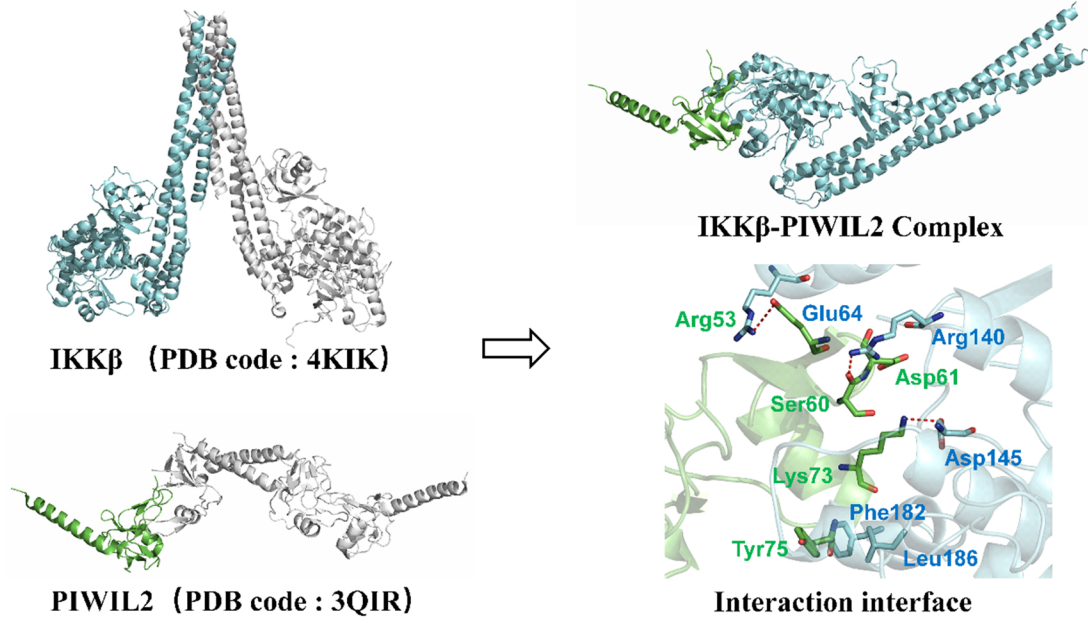

Supplement: 41418_2020_725_MOESM4_ESM.pdf [file 41418_2020_725_MOESM4_ESM.pdf]
